# Supplementary material
Source: Springer Nature journal article supplement (https://mijn.bsl.nl/resource/supplementary/13047_2008_87_MOESM2_ESM.pdf/7109568)

Meat 1

A

B

C

Pre

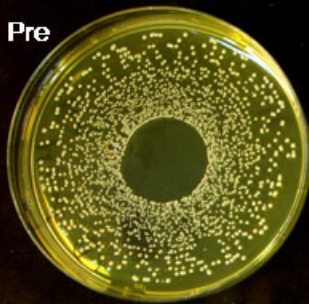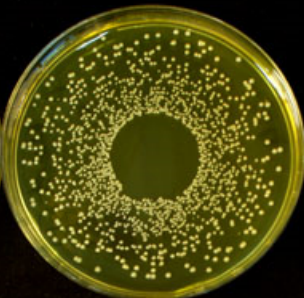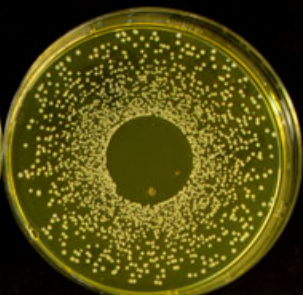

Post

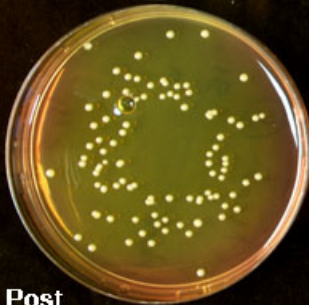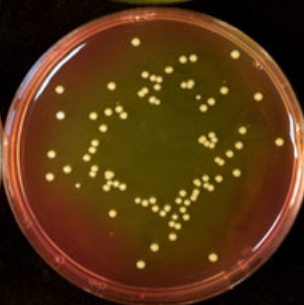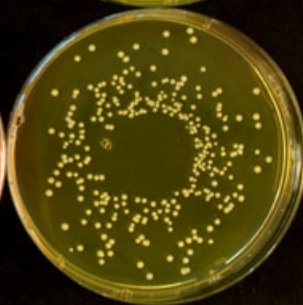

Supplement: MOESM2 [file 7109568]
